# Supplementary material
Source: PubMed Central journal article supplement (PMC4677882)
Supplement: supp_pp.15.00769_00769suppfigstbls.pdf [file supp_pp.15.00769_00769suppfigstbls.pdf]

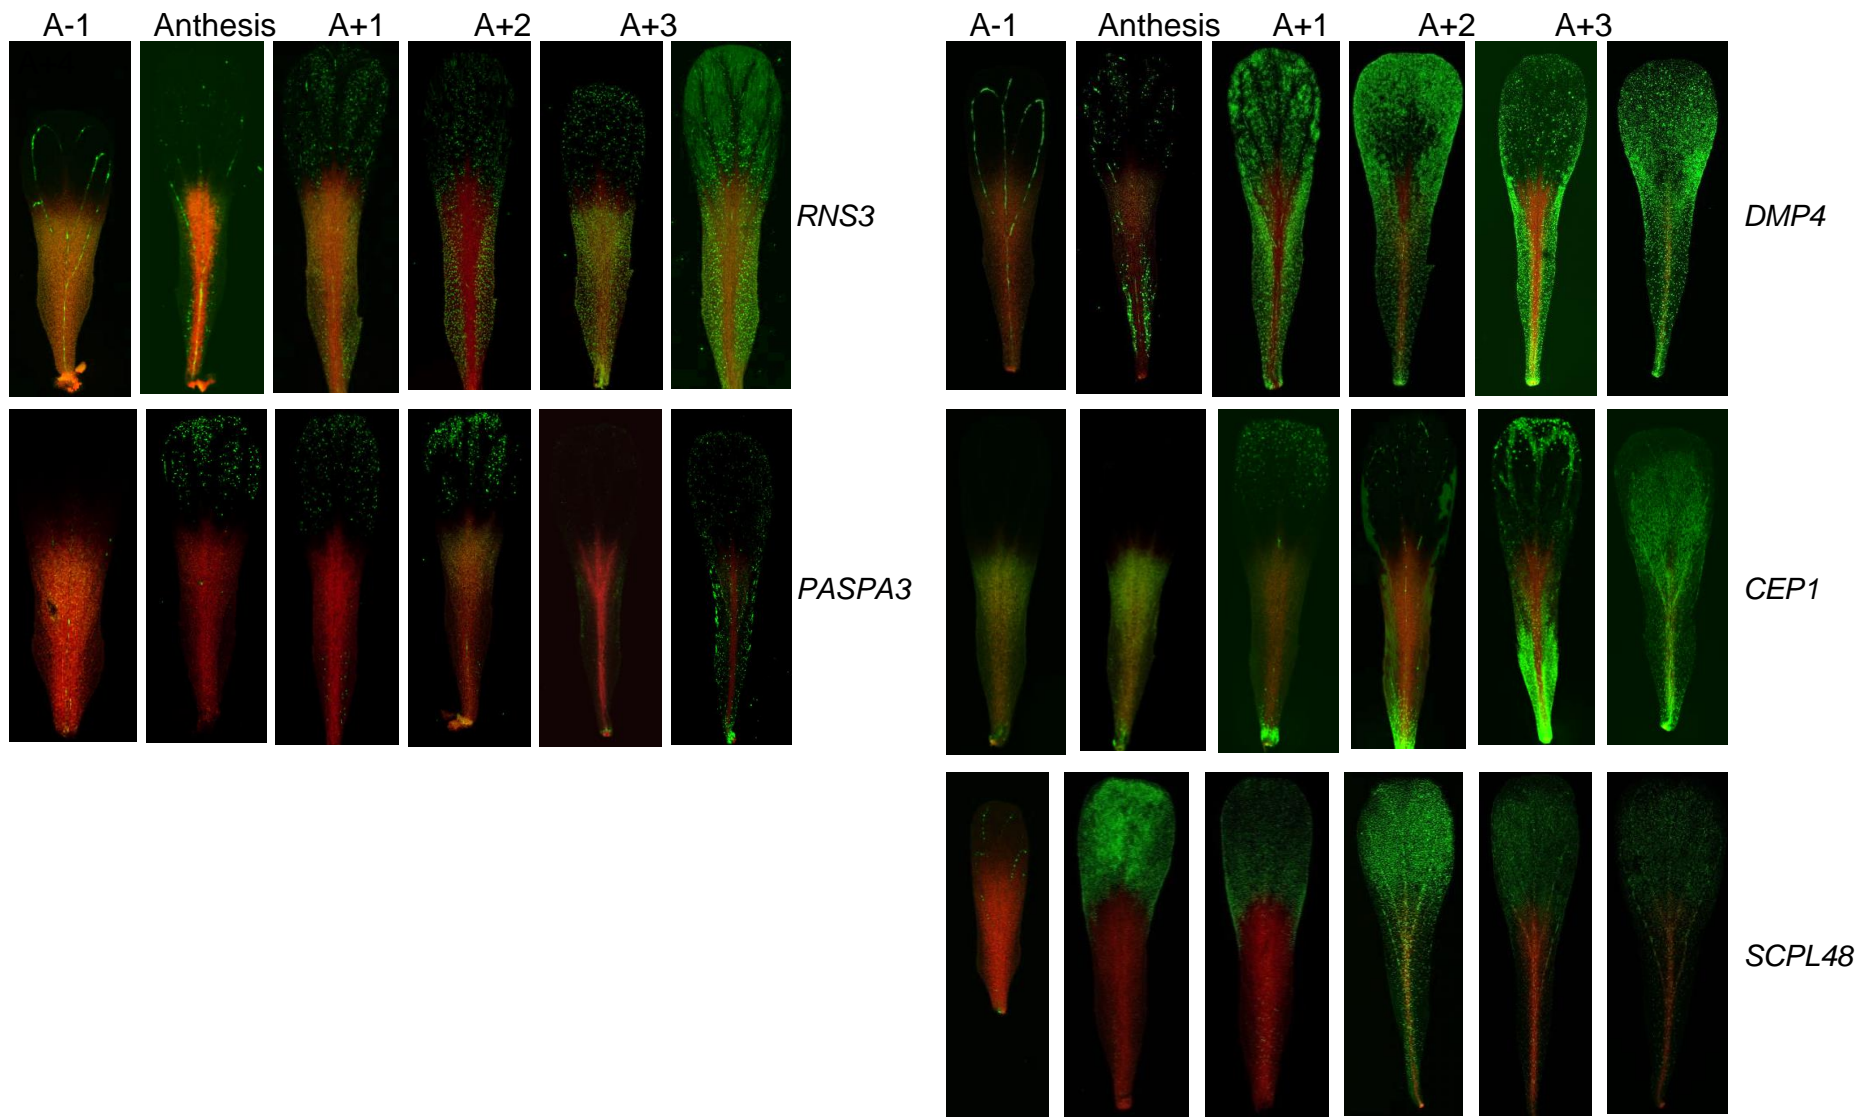

**Supplemental Figure S1.** Developmental series for petal senescence. The series starts one bud before anthesis (A-1), followed by the subsequent flowers before the dry stage (Anthesis, A+1 to A+4). Petals were dissected under a stereoscopic microscope, mounted in slides using Tween 0.01% dissolved in 1/10 MS and imaged in 2x4 tiles using confocal microscopy. The flowers were collected from one or two inflorescences from homozygous lines of the indicated transcriptional fusions with H2A-GFP cloned in a GAL4-UAS transactivation system.

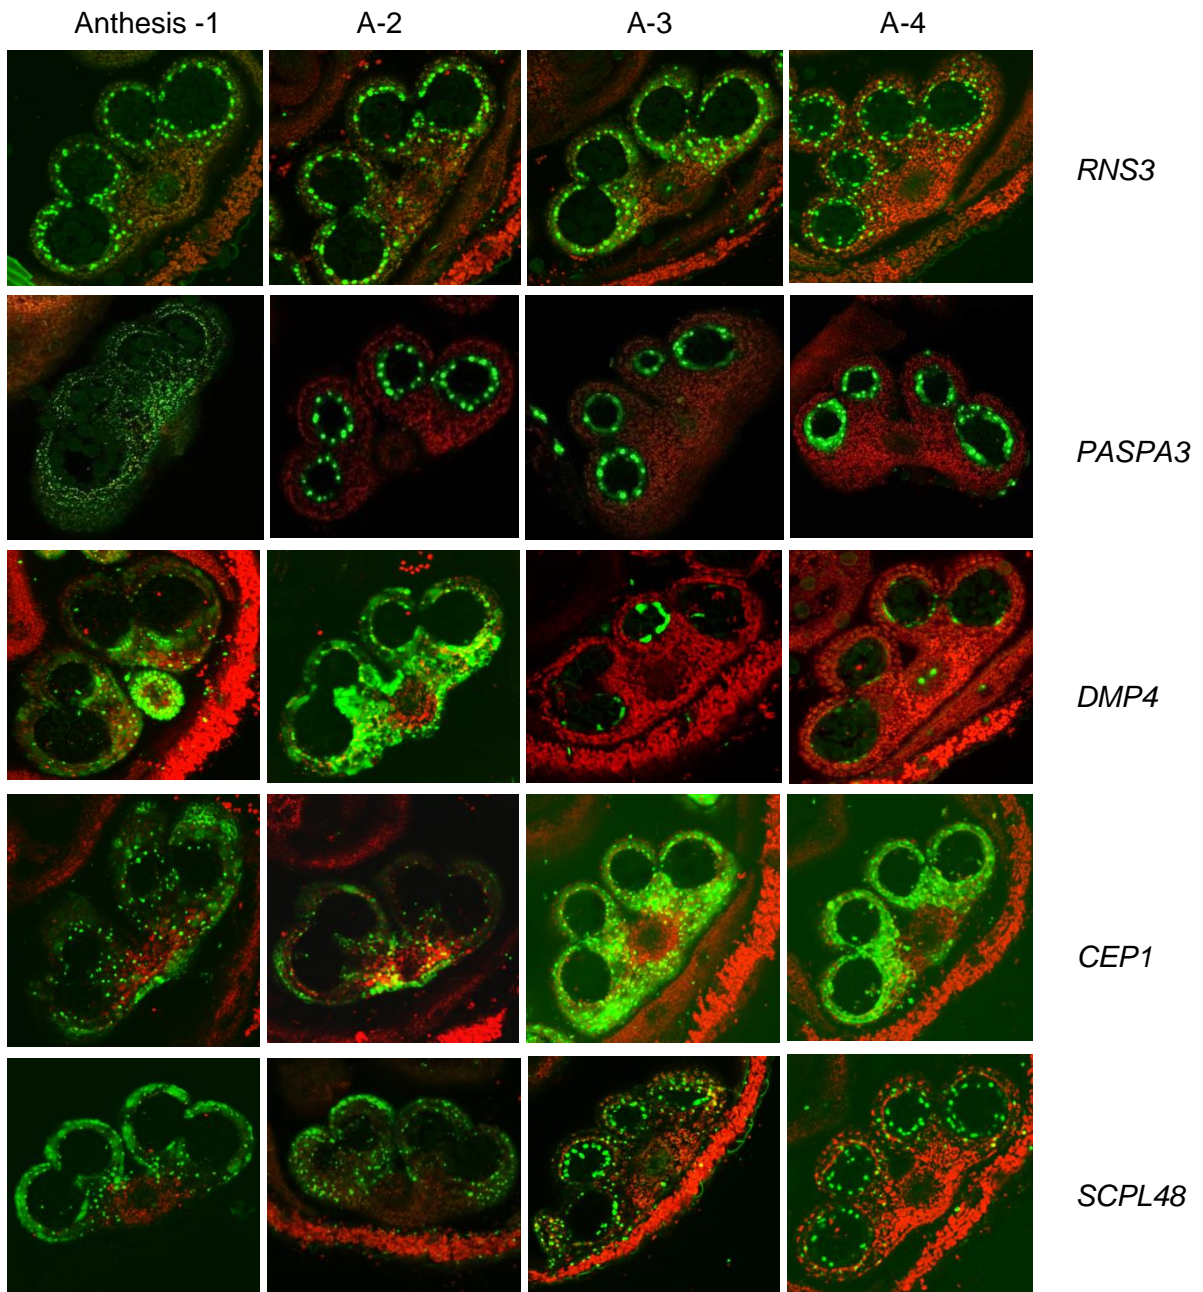

**Supplemental Figure S2.** Developmental series for tapetum differentiation. The series starts one bud before anthesis (Anthesis-1), and the previous floral buds around tapetum cell death (A-2 to A-4). Flowers at the indicated developmental stage were fixed for 2 hours at room temperature in a 3.7% Paraformaldehyde solution (dissolved in 50mM PIPES, 5mM EGTA and 1mM MgSO<sub>4</sub> buffer), embedded in 5% agarose blocks and sectioned using a vibratome. They were mounted in slides with water and imaged using confocal microscopy. The flowers were collected from one or two inflorescences of the same plant using homozygous lines of the indicated transcriptional fusions with H2A-GFP in a GAL4-UAS transactivation system.

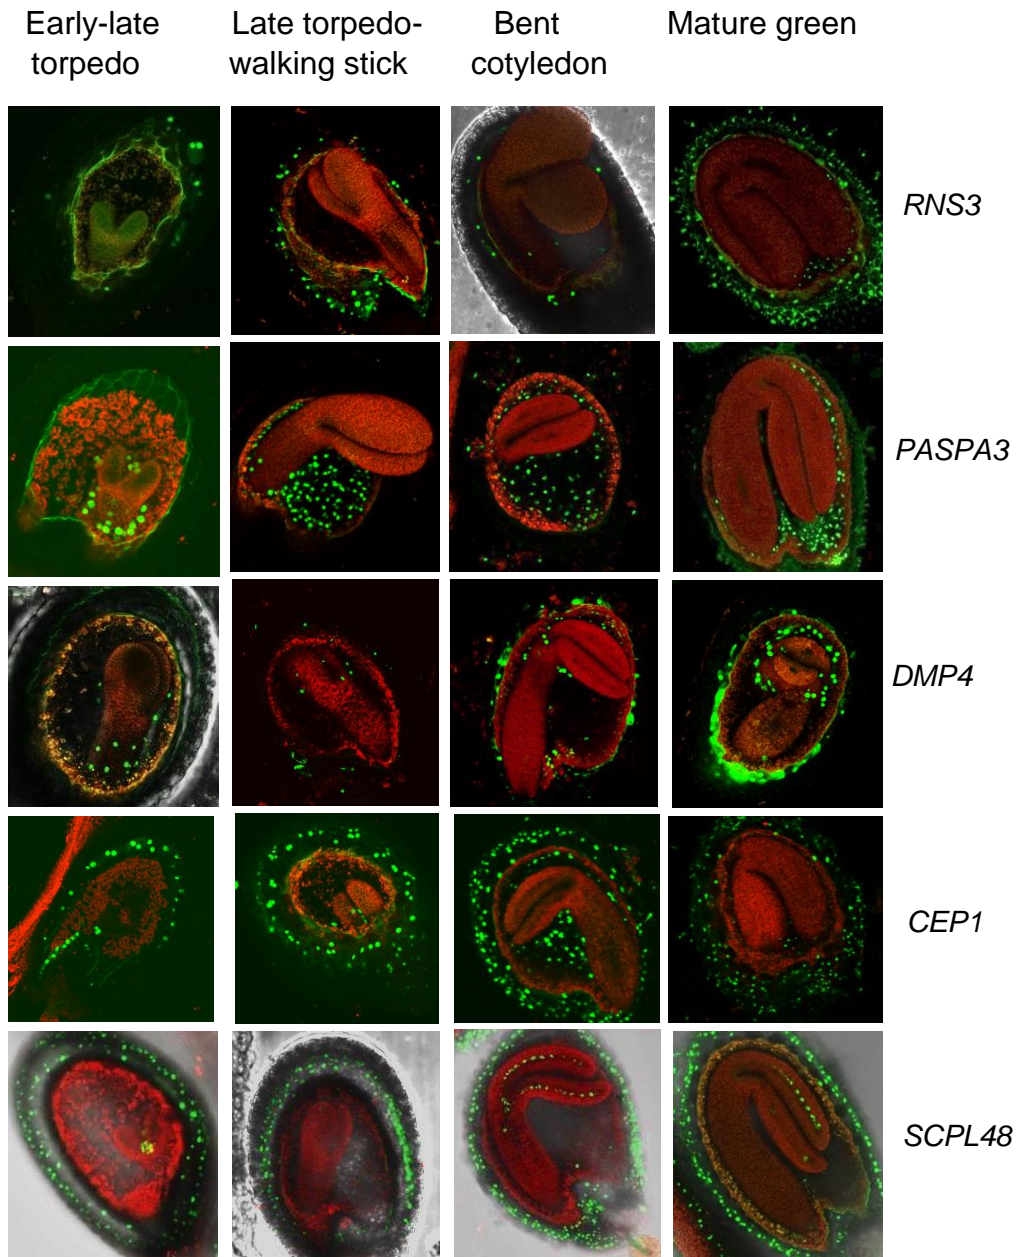

**Supplemental Figure S3.** Developmental series for seed development. Siliques at the indicated developmental stage were dissected in a stereoscopic microscope to remove the valves, fixed for 2 hours at room temperature in a 3.7% Paraformaldehyde solution (dissolved in 50mM PIPES, 5mM EGTA and 1mM MgSO<sub>4</sub> buffer), embedded in 5% agarose blocks and sectioned using a vibratome. They were mounted with water in slides and imaged using CLSM. The siliques were collected from one or two stems of the same plant using homozygous lines of the indicated transcriptional fusions with H2A-GFP in a GAL4-UAS transactivation system.

## Supplementary Figure S4

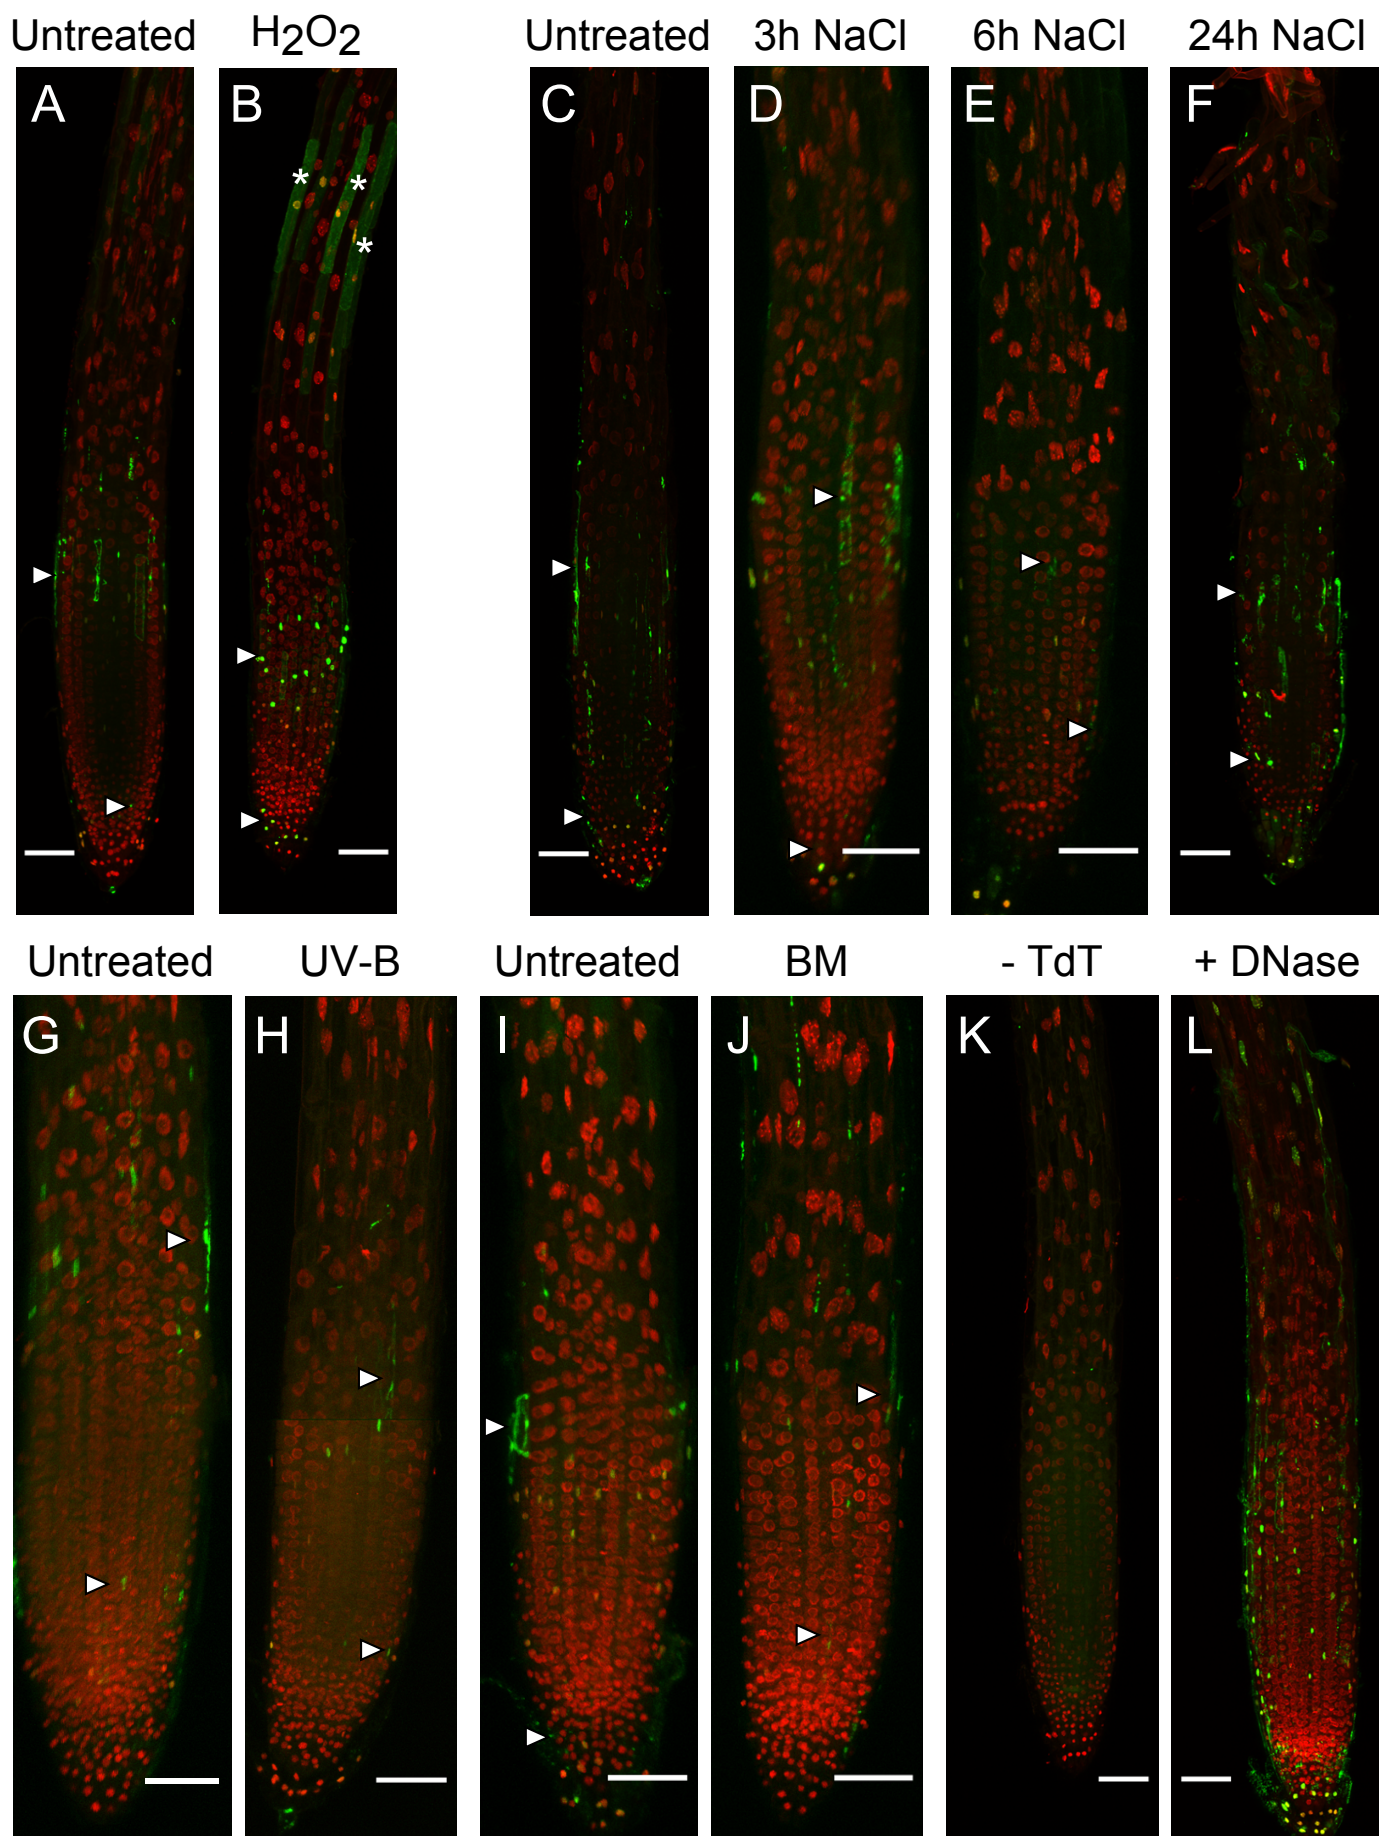

**Supplemental Figure S4. Whole-mount TUNEL of 5- to 6-day old root tip after different abiotic stresses provoking cell death.** TUNEL signals are in green, DAPI signals in red. A-B) Oxidative stress. A) untreated control. B) after treatment with 5mM H<sub>2</sub>O<sub>2</sub> for 3h. C-F) salt stress. C) untreated control. D) after 3h, E) after 6h, F) after 24h of treatment with 140mM NaCl. G-H) ultraviolet radiation stress. G) non-radiated control. H) 8h after exposure to UV-B radiation. I-J) genotoxic stress, I) non-treated control, J) after 24h of treatment with 0.6 μg/ml bleomycin. K) negative control without TdT enzyme. L) positive control after DNase treatment. Scale bars are 50 μm.

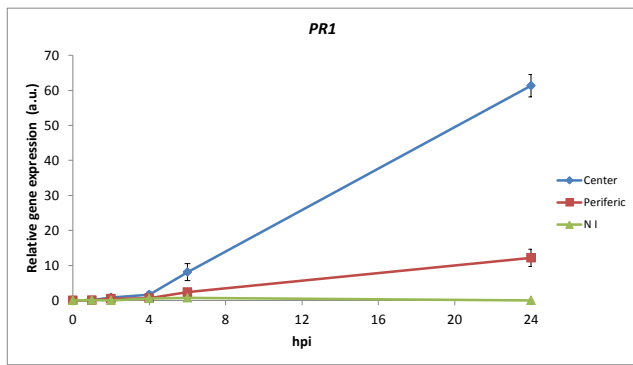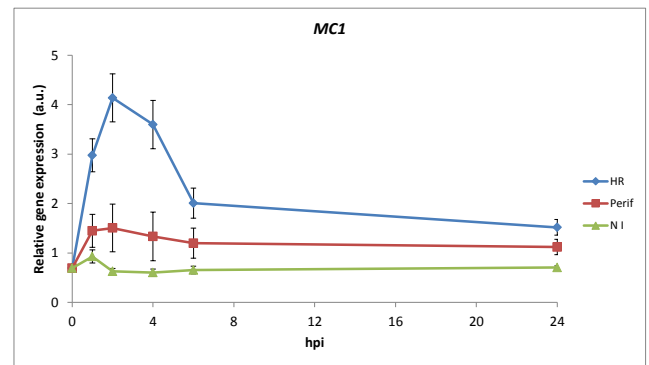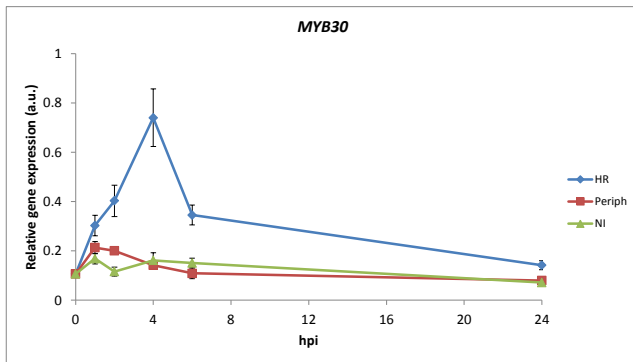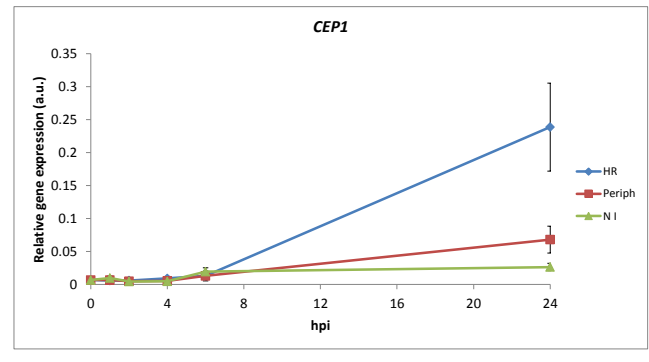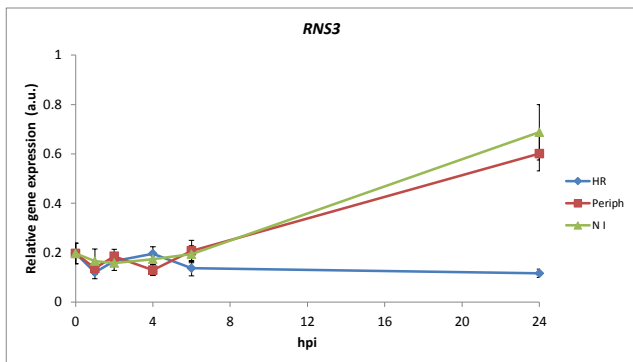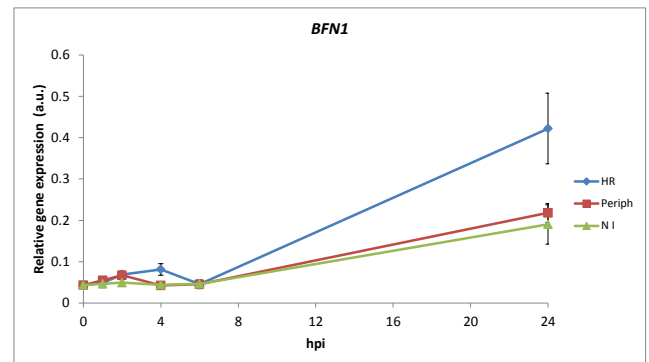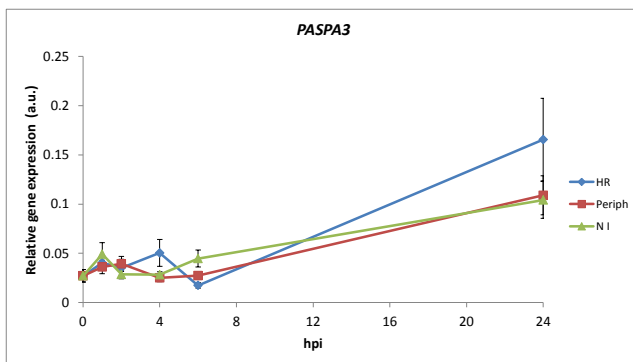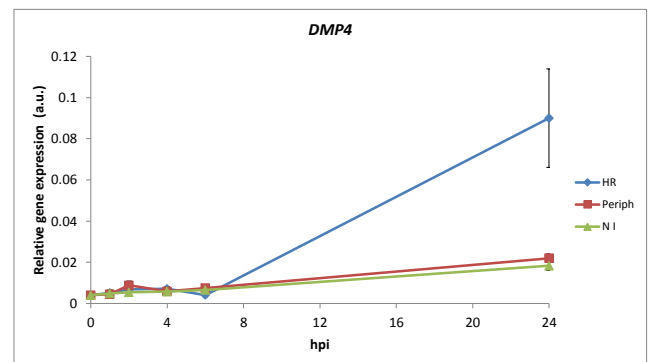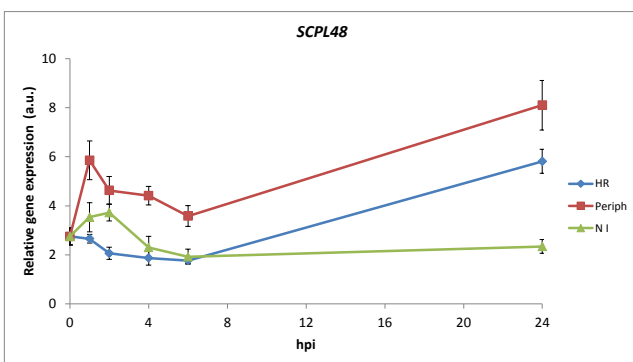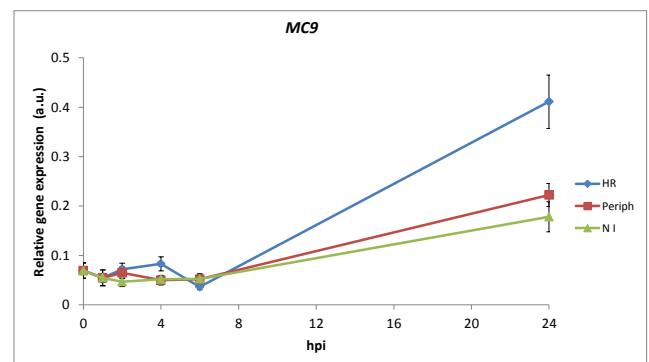

**Supplemental Figure S4. dPCD marker genes are not transcriptionally regulated during HR-related ePCD.** Arabidopsis Col-0 plants were inoculated with *Pst* AvrRpm1 ( $5 \times 10^7$  cfu/ml). Leaf samples were harvested at the indicated time points from areas inside the infiltrated zone that develops the HR (HR; blue), immediately neighboring the infiltrated zone (periph; red), and from non-inoculated tissues (NI; green) at the indicated time points. Relative expression of the indicated genes in the three zones was determined by Q-RT-PCR. PATHOGENESIS RELATED1 (PR1), METACASPASE1 (MC1), and MYB DOMAIN PROTEIN 30 (MYB30) were used as HR marker genes. Expression values were normalized using SAND family gene as internal standard. Mean and SEM values were calculated from 3 independent experiments with 3 replicates. hpi: hours after inoculation; a.u.: arbitrary units.

**Supplemental Table S3.** Detailed overview of the ATH1 microarray experiments used for the meta-analysis, describing the treatment leading to programmed cell death (PCD), the control treatment, the PCD subcategory, the presence/absence of a time course (TC) in the experiment, a summary description for the experiment, the experiment identifier and CEL file identifiers for the biological replicates. When a paper was referred for the experiment it is mentioned in the last column, otherwise it is marked as non-available (NA).

| PCD                                                                                         | Control                                                               | PCD type           | TC | Description                                                                                                                                        | Identifier                                   | CEL files                                                    | Ref. |
|---------------------------------------------------------------------------------------------|-----------------------------------------------------------------------|--------------------|----|----------------------------------------------------------------------------------------------------------------------------------------------------|----------------------------------------------|--------------------------------------------------------------|------|
| Differentiating xylem                                                                       | Cortex                                                                | Tracheary elements | No | sorted cells from 6 day-old roots, cell type specific- GFP expressing protoplast                                                                   | GSE16468                                     | GSM413912 -14, GSM413909- 11                                 | (1)  |
| VND6 and SND1 expressing cells                                                              | WT cells                                                              | Tracheary elements | No | cells treated with 2 $\mu$ M estrogen for 12h                                                                                                      | GSE20586                                     | GSM517076 - 78, 82 -84, 88-90                                | (2)  |
| 35S:VND7-VP16-GR                                                                            | Empty vector                                                          | Tracheary elements | No | 10 day old seedlings treated with 10mM CHX for 2hrs followed by 10mM DEX for 4hrs                                                                  | GSE24169                                     | GSM594701-05, GSM594711-15                                   | (3)  |
| J3411:GFP, Lateral root cap plus epidermis                                                  | J0571:GFP, ground tissue (endodermis and cortex) and the QC           | Lateral Root Cap   | No | sorted cells from 4-5 day-old roots, cell type specific- GFP expressing protoplast                                                                 | GSE5749                                      | GSM133968-70 GSM133992-93                                    | (4)  |
| Peripheral endosperm-bending cotyledon stage                                                | Embryo proper-bending cotyledon stage                                 | Endosperm          | No | Siliques containing bending cotyledon stage seeds were sectioned and the seed compartments were isolated using Laser Capture Microdissection (LCM) | GSE20039                                     | GSM501159-60 GSM501157-58                                    | (5)  |
| Cellularized endosperm-linear cotyledon stage, Peripheral endosperm-bending cotyledon stage | Peripheral endosperm-globular stage, Peripheral endosperm-heart stage | Endosperm          | No | Siliques containing seeds in the appropriate stage were sectioned and the seed compartments were isolated using LCM                                | GSE12403<br>GSE20039<br>GSE11262<br>GSE15160 | GSM311289-90<br>GSM501159-60<br>GSM284390-91<br>GSM378649-50 | (6)  |
| General seed coat-bending cotyledon and linear cotyledon stage                              | LCM general seed coat at the heart stage                              | Seed coat          | No | Siliques between 1.2 and 1.5 cm long, 1.6 and 1.9 cm long and 1.9-2.0 cm long were sectioned and the seed compartments isolated using LCM          | GSE20039<br>GSE12403<br>GSE15160             | GSM501165-66<br>GSM311295-96<br>GSM378657-58                 | (5)  |
| Inducible overexpression ANAC059 and ANAC092                                                | Empty vector                                                          | Senescence         | No | 3 weeks old shoots treated with 10 $\mu$ M estradiol and harvested 5 hours after induction                                                         | GSE14091                                     | GSM353584-88<br>GSM353591-93                                 | (7)  |
| Partially senescent leaves, developmental stage: 6.0                                        | Fully developed green leaves, developmental stage: 3.9                | Senescence         | No | Leaves were harvested at two stages to identify the senescence- enhanced genes                                                                     | GSE5727                                      | GSM133729-32                                                 | NA   |
| Senescent leaf                                                                              | Rosette leaf # 6                                                      | Senescence         | No | AtGenExpress: Developmental series                                                                                                                 | GSE5630                                      | GSM131513-15                                                 | NA   |

|                                                                                                         |                                                        |               |     |                                                                                                                                                                                                                                                                                                    |          |                                                                                                  |      |
|---------------------------------------------------------------------------------------------------------|--------------------------------------------------------|---------------|-----|----------------------------------------------------------------------------------------------------------------------------------------------------------------------------------------------------------------------------------------------------------------------------------------------------|----------|--------------------------------------------------------------------------------------------------|------|
|                                                                                                         |                                                        |               |     | (leaves)                                                                                                                                                                                                                                                                                           |          | GSM131537-39                                                                                     |      |
| Flowers stage 15, petals                                                                                | Flowers stage 12, petals                               | Senescence    | No  | AtGenExpress: Developmental series (flowers and pollen)                                                                                                                                                                                                                                            | GSE5632  | GSM131588-90<br>GSM131606-08                                                                     | NA   |
| Flowers stage 15, sepals                                                                                | Flowers stage 12, sepals                               | Senescence    | No  | AtGenExpress: Developmental series (flowers and pollen)                                                                                                                                                                                                                                            | GSE5632  | GSM131585-87<br>GSM131603-05                                                                     | NA   |
| Senescing siliques of 20 days after anthesis                                                            | Mature green silique tissues of 10 days after anthesis | Senescence    | No  | Two pods collected from each plant and pooled from 20 plants                                                                                                                                                                                                                                       | GSE5736  | GSM133816-21                                                                                     | (8)  |
| <i>saul1</i> mutants transferred to low light treatment for 0, 48h                                      | wt transferred to low light treatment for 0, 48h       | Senescence    | Yes | 11 d old seedlings grown in permissive light (60 $\mu\text{mol m}^{-2} \text{s}^{-1}$ ) and then transferred to low light treatment                                                                                                                                                                | NA       | NA                                                                                               | (9)  |
| When 10-30 % cell death was observed in protoplasts the samples were harvested and pooled in one sample | No cell death                                          | Biotic stress | No  | 6-day old, dark grown cell cultures were treated with 20 $\mu\text{M}$ Fumonisin B1 (mycotoxin that induces PCD by disrupting ceramide synthesis) or Methanol as mock treatment, pooled and then protoplasted                                                                                      | GSE5735  | GSM133808-15                                                                                     | NA   |
| <i>cpr5</i> mutant                                                                                      | Wt                                                     | Biotic stress | No  | <i>Cpr5</i> mutant exhibits spontaneous cell death and heightened immunity                                                                                                                                                                                                                         | GSE40322 | GSM991294-99                                                                                     | (10) |
| Wt                                                                                                      | <i>rpp4</i> mutant                                     | Biotic stress | Yes | 2-week old leaves were inoculated with <i>Hyaloperonospora arabidopsidis</i> Emwa1. RNA extracted 0 and 6 days after inoculation. <i>rpp4</i> mutant had the highest percentage of leaves with sporangiophores (SPP), confirming that its resistance to <i>Hpa</i> Emwa1 is completely compromised | GSE22274 | GSM554311_rep1, _rep2<br>GSM554315_rep1, _rep2<br>GSM554316_rep1, _rep2<br>GSM554320_rep1, _rep2 | (11) |
| 30 h after inoculation                                                                                  | Before inoculation                                     | Biotic stress | No  | 2 week old Wt roots were inoculated with <i>Phytophthora parasitica</i> 310 strain ( $10^6$ )                                                                                                                                                                                                      | GSE20226 | GSM507047-48,<br>GSM507055-56                                                                    | (12) |

|                                                                                                                    |                                                                                         |                  |     |                                                                                                                                                                                                                                    |          |                               |      |
|--------------------------------------------------------------------------------------------------------------------|-----------------------------------------------------------------------------------------|------------------|-----|------------------------------------------------------------------------------------------------------------------------------------------------------------------------------------------------------------------------------------|----------|-------------------------------|------|
|                                                                                                                    |                                                                                         |                  |     | zoospores per Petri dish)                                                                                                                                                                                                          |          |                               |      |
| <i>Botrytis cinerea</i> conidiospores                                                                              | Mock treated                                                                            | Biotic stress    | Yes | Four 5 ul droplets of <i>Botrytis cinerea</i> conidiospores diluted to 5X10 <sup>5</sup> spores/ml or sterile potato dextrose broth were placed on each of 4-5 rosette leaves (4 week old) per plant. Leaves were harvested 18 hpi | GSE5684  | GSM133025-36                  | (13) |
| <i>Phytophthora infestans</i> spores                                                                               | Water drops on leaves                                                                   | Biotic stress    | Yes | <i>Phytophthora infestans</i> (5x10 <sup>5</sup> spores) in water applied to 5 week old leaf surfaces. Tissue was harvested 6, 12, 24 hpi                                                                                          | GSE5616  | GSM131160-68, GSM131151-59    | NA   |
| 1 μM GST-NPP1 in water                                                                                             | 1 μM GST in water                                                                       | Biotic stress    | No  | 5 week old leaves infiltrated, harvested 4 hours later                                                                                                                                                                             | GSE5615  | GSM131110, 12, 24, 26, 38, 40 | NA   |
| Chitosan 150 μg/ml                                                                                                 | Mock solution (0.02% acetic acid)                                                       | Biotic stress    | No  | 4 day-old seedlings were treated for 3 hours before RNA extraction                                                                                                                                                                 | GSE17193 | GSM429956,61 GSM429980-81,    | (14) |
| 10 μM HrpZ                                                                                                         | leaves infiltrated with water                                                           | Biotic stress    | No  | 5-weeks old rosette leaves treated for 4 hours                                                                                                                                                                                     | GSE5615  | GSM131111, 22, 25, 36, 39,50  | NA   |
| AtMYB30-ox                                                                                                         | Arabidopsis AtMYB30-as                                                                  | Biotic stress    | No  | 4 weeks old leaves, 90-105 min after inoculation with a <i>Xanthomonas</i> strain, Xcc147                                                                                                                                          | GSE9674  | GSM244451-52, 58-59           | (15) |
| Inoculation with <i>Pseudomonas syringae</i> pv. <i>tomato</i> (Pto) expressing the effector HopZ1a into Wt plants | Inoculation with <i>Pseudomonas syringae</i> pv. <i>tomato</i> (Pto) wt, into WT plants | Biotic stress    | No  | The effector HopZ1a is recognized in <i>Arabidopsis</i> , triggering the hypersensitive response (HR). Rosette leaf 1-5 harvested 6 hpi                                                                                            | GSE21920 | GSM545364, 67, 72 84-86       | NA   |
| Cucumber mosaic virus (CMV) 2b counter-defense protein- expressing plants                                          | Wt plants, mock treated                                                                 | Biotic stress    | No  | The Cucumber mosaic virus (CMV) 2b counter-defense protein disrupts plant antiviral mechanisms mediated by RNA silencing and salicylic acid (SA)                                                                                   | GSE37921 | GSM929932-33, 35, 36, 38, 39  | (16) |
| Cell suspension cultures were exposed to high                                                                      | Cell suspension cultures were kept at 50 microE/m2/s                                    | Oxidative stress | No  | 200 mL of cultures with a cell density of approximately 150-200 mg/mL, kept at constant temperature                                                                                                                                | GSE22671 | GSM562208-10, GSM562214-16    | (17) |



|                                                                                      |                                                                               |                  |     |                                                                                                                                                                                        |          |                                                                                                                                                 |      |
|--------------------------------------------------------------------------------------|-------------------------------------------------------------------------------|------------------|-----|----------------------------------------------------------------------------------------------------------------------------------------------------------------------------------------|----------|-------------------------------------------------------------------------------------------------------------------------------------------------|------|
| light during 30 minutes (1800 microE/m <sup>2</sup> /s)                              |                                                                               |                  |     |                                                                                                                                                                                        |          |                                                                                                                                                 |      |
| <i>flu</i> mutant                                                                    | Wt                                                                            | Oxidative stress | No  | Plants grown under continuous light 90 mmol. m <sup>-2</sup> . s <sup>-1</sup> for 3 weeks, transferred to the dark for 8 h and rosette leaves were harvested 2 h after reillumination | GSE10812 | GSM272985-88                                                                                                                                    | (18) |
| Wt, 20mM hydrogen peroxide                                                           | Wt, sprayed with deionised water                                              | Oxidative stress | No  | 2 week old seedlings were harvested 3 hr after treatment                                                                                                                               | GSE41136 | GSM1009029-34                                                                                                                                   | NA   |
| Fumigation with 500 ppb ozone .                                                      | Fumigation with scrubbed air (filtered through charcoal and purafill)         | Oxidative stress | No  | 2 week-old seedlings were harvested 6 hr after treatment. Flow rate was 910ml/min                                                                                                      | GSE5722  | GSM133705-10                                                                                                                                    | NA   |
| Wt seedlings treated with 5mM H <sub>2</sub> O <sub>2</sub>                          | Untreated                                                                     | Oxidative stress | No  | 7d dark-grown seedlings were used to reduce the endogenous H <sub>2</sub> O <sub>2</sub> level caused by light                                                                         | GSE40574 | GSM996955-58                                                                                                                                    | (19) |
| Methyl viologen (10 uM final conc) was added to the media to induce Oxidative stress | Control plants were handled like the treated plants and harvested in parallel | Oxidative stress | Yes | 18-day-old shoots were harvested 12 and 24 h after treatment                                                                                                                           | ME00340  | OXIDATIVE_12H_SHOOT_REP1, REP2, OXIDATIVE_24H_SHOOT_REP1, REP2, OXIDATIVE_CONTROL_1 2H_SHOOT_REP1, REP2 OXIDATIVE_CONTROL_2 4H_SHOOT_REP1, REP2 | NA   |
| Methyl viologen (10 uM final conc) was added to the media to induce Oxidative stress | Control plants were handled like the treated plants and harvested in parallel | Oxidative stress | Yes | 18-day-old roots were harvested 12 and 24 h after treatment                                                                                                                            | ME00340  | OXIDATIVE_12H_ROOT_REP1, REP2, OXIDATIVE_24H_ROOT_REP1, REP2, OXIDATIVE_CONTROL_1 2H_ROOT_REP1, REP2 OXIDATIVE_CONTROL_2 4H_ROOT_REP1, REP2     | NA   |

|                                                            |                                               |                  |     |                                                                     |                          |                                                               |      |
|------------------------------------------------------------|-----------------------------------------------|------------------|-----|---------------------------------------------------------------------|--------------------------|---------------------------------------------------------------|------|
| <i>cat2</i> mutant, high light exposure in a sun simulator | <i>cat2</i> , Ambient growth conditions       | Oxidative stress | Yes | 6 week old leaves were harvested 0, 3 and 8 h after treatment       | E-MEXP-449               | pz220803_04, _05, _12, hyb1480, 81, 83                        | NA   |
| <i>wee1</i> KO, transferred to medium with 2mM Hydroxyurea | <i>wee1</i> KO, transferred to control medium | Genotoxic stress | Yes | 5d old roots were harvested 5 and 24 h after treatment              | E-MEXP-3048, E-MEXP-3053 | hyb2133-36, 39-42                                             | (20) |
| 1.5ug/ml bleomycin + 22 ug/ml mitomycin                    | Control- no treatment                         | Genotoxic stress | Yes | 16 d old seedling shoots were harvested 12 and 24 h after treatment | GSE5620<br>GSE5625       | GSM131251,52,55,56<br>GSM131375,76,79,80                      | NA   |
| 1.5ug/ml bleomycin + 22 ug/ml mitomycin                    | Control- no treatment                         | Genotoxic stress | Yes | 16 d old seedling roots were harvested 12 and 24 h after treatment  | GSE5620<br>GSE5625       | GSM131253,54,57,58<br>GSM131377,78,81,82                      | NA   |
| Thaxtomin A                                                | Methanol                                      | Genotoxic stress | No  | suspension cell culture 6 h after treatment                         | GSE17824                 | GSM444737-44                                                  | NA   |
| Isoxaben                                                   | Methanol                                      | Genotoxic stress | No  | Suspension cell culture, 6 h after treatment                        | GSE17824                 | GSM444745-52                                                  | NA   |
| UV-1-day radiation                                         | Continuous white light                        | UV stress        | No  | 18 d old seedlings, shoots harvested 24h after treatment            | GSE22951                 | GSM566614-16<br>GSM566623-25                                  | NA   |
| UV-B stress (15 min. 1.18 W/m <sup>2</sup> )               | Control- no treatment                         | UV stress        | Yes | 16 d old seedlings, Shoots harvested 12 and 24 h after treatment    | GSE5626                  | GSM131403-04<br>GSM131407-08                                  | (17) |
| UV-B stress (15 min. 1.18 W/m <sup>2</sup> )               | Control- no treatment                         | UV stress        | Yes | 16 d old seedlings<br>Roots-12 and 24 h                             | GSE5626                  | GSM131405-06<br>GSM131409-10                                  | (17) |
| 30 h at 37 °C Heat stress, no recovery                     | No treatment, no recovery                     | Heat stress      | No  | 3 week old seedling                                                 | GSE18666                 | GSM463683-86                                                  | (21) |
| 55 C for 10 minutes                                        | No treatment                                  | Heat stress      | No  | 6 d suspension cells                                                | NASCARRA<br>YS-30        | NRID5299-<br>NRID5304_Swidzinski                              | NA   |
| 250mM NaCl solution                                        | Only water supply                             | Salt stress      | No  | 5-week-old rosette leaves harvested 24 h after treatment            | E-ATMX-30                | E-ATMX-30.raw.1.zip/ WT-<br>NaCl1.CEL /<br>WT_NaCl2.CEL / WT- | (22) |

|                                                     |                                                      |                             |     |                                                                                            |                    |                                                                                                                      |      |
|-----------------------------------------------------|------------------------------------------------------|-----------------------------|-----|--------------------------------------------------------------------------------------------|--------------------|----------------------------------------------------------------------------------------------------------------------|------|
|                                                     |                                                      |                             |     |                                                                                            |                    | 1.CEL /WT-2                                                                                                          |      |
| 140 mM NaCl                                         | No treatment                                         | Salt stress                 | Yes | whole seedling roots ,5 days after germination, were harvested 16 and 32 h after treatment | GSE7642            | GSM184925-26,<br>GSM184933-36                                                                                        | (23) |
| Nacl 150 mM                                         | No treatment                                         | Salt stress                 | Yes | 16 d old seedling shoots were harvested 12 and 24 h after treatment                        | GSE5623            | GSM131323-24,<br>GSM131327-28                                                                                        | (17) |
| Nacl 150 mM                                         | No treatment                                         | Salt stress                 | Yes | 16 d old seedling roots were harvested 12 and 24 h after treatment                         | GSE5623            | GSM131325-26,<br>GSM131329-30                                                                                        | (17) |
| Wildtype_24H<br>0°C_Rep1                            | Wildtype_no<br>treatment_Rep2                        | Cold stress                 | No  | 10 day old seedlings-grown in plate                                                        | GSE3326            | GSM74900-01,<br>GSM748995                                                                                            | (24) |
| 4°C_under<br>continuous light<br>(~25 umol m-2 s-1) | 24°C_under<br>continuous light<br>(~25 umol m-2 s-1) | Cold stress                 | No  | 10 day old seedlings-grown in plate<br>18 days old, aerial parts, soil grown               | GSE5534<br>GSE5535 | GSM128789-90,<br>GSM128795-96,<br>GSM128797-98<br>GSM128803-04                                                       | NA   |
| 0.3 M mannitol                                      | Control- no<br>treatment                             | Osmotic stress              | Yes | 16-day-old seedlings, Shoots harvested 12 and 24 h after treatment                         | GSE5622            | GSM131299-300<br>GSM131303-304                                                                                       | (17) |
| 0.3 M mannitol                                      | Control- no<br>treatment                             | Osmotic stress              | Yes | 16-day-old seedlings, Shoots harvested 12 and 24 h after treatment                         | GSE5622            | GSM131301-302<br>GSM131305-306                                                                                       | (17) |
| 0.3M mannitol                                       | Mock treated                                         | Osmotic stress              | No  | 30 d old leaf, 10 day treatment                                                            | GSE36789           | GSM901069-71<br>GSM901075-77                                                                                         | (25) |
| 0.3M mannitol                                       | Mock treated                                         | Osmotic stress              | No  | 30 d old root, 10 day treatment                                                            | GSE36789           | GSM901072-74<br>GSM901078-80                                                                                         | (25) |
| ACC (10 uM)<br>ethylene precursor                   | Mock (3 hours)                                       | Hormone<br>(Ethylene)       | No  | 7-day-old seedling, 3 h after treatment                                                    | ME00334            | RIKEN-GODA23A, 23B<br>RIKEN-GODA17BA,17AA                                                                            | NA   |
| 5 ppm ethylene                                      | Air                                                  | Hormone<br>(Ethylene)       | No  | Petiole harvested 3 h after treatment                                                      | NASC<br>ARRAYS-32  | Millenaar_A2_ETH_Rep1,<br>Rep2,<br>Millenaar_A5_ETH_Rep3,<br>Millenaar_A1_AIR_Rep1,<br>Rep2<br>Millenaar_A4_AIR_Rep3 | NA   |
| 10 ppm ethylene                                     | Air                                                  | Hormone<br>(Ethylene)       | No  | 7-day-old seedling, 3 h after treatment                                                    | ME00364            | RIKEN-GODA21AH, BH<br>RIKEN-GODA1AH, BH                                                                              | (26) |
| Salicylic acid (10<br>uM, 3 hours)                  | Mock (3 hours)                                       | Hormone<br>(Salicylic acid) | No  | 3 week old plants, 4 h after treatment                                                     | GSE14247           | GSM356823-26                                                                                                         | NA   |
| 2 mM SA treated                                     | Water treated                                        | Hormone<br>(Salicylic acid) | No  | 9-day-old seedling, 24 h after treatment                                                   | GSE14961           | GSM373532-36                                                                                                         | NA   |

1

2

- 3 1. Lee JY, Colinas J, Wang JY, Mace D, Ohler U, Benfey PN. Transcriptional and posttranscriptional regulation of transcription factor expression in  
4 *Arabidopsis* roots. *Proc Natl Acad Sci U S A*. 2006;103(15):6055-60.
- 5 2. Ohashi-Ito K, Oda Y, Fukuda H. *Arabidopsis* VASCULAR-RELATED NAC-DOMAIN6 directly regulates the genes that govern programmed cell death and  
6 secondary wall formation during xylem differentiation. *Plant Cell*. 2010;22(10):3461-73.
- 7 3. Yamaguchi M, Mitsuda N, Ohtani M, Ohme-Takagi M, Kato K, Demura T. VASCULAR-RELATED NAC-DOMAIN7 directly regulates the expression of a  
8 broad range of genes for xylem vessel formation. *Plant J*. 2011;66(4):579-90.
- 9 4. Birnbaum K, Shasha DE, Wang JY, Jung JW, Lambert GM, Galbraith DW, et al. A gene expression map of the *Arabidopsis* root. *Science*.  
10 2003;302(5652):1956-60.
- 11 5. Zuber H, Davidian JC, Aubert G, Aime D, Belghazi M, Lugan R, et al. The seed composition of *Arabidopsis* mutants for the group 3 sulfate transporters  
12 indicates a role in sulfate translocation within developing seeds. *Plant Physiol*. 2010;154(2):913-26.
- 13 6. Le BH, Cheng C, Bui AQ, Wagmaister JA, Henry KF, Pelletier J, et al. Global analysis of gene activity during *Arabidopsis* seed development and  
14 identification of seed-specific transcription factors. *Proc Natl Acad Sci U S A*. 2010;107(18):8063-70.
- 15 7. Balazadeh S, Siddiqui H, Allu AD, Matallana-Ramirez LP, Caldana C, Mehrnia M, et al. A gene regulatory network controlled by the NAC transcription  
16 factor ANAC092/AtNAC2/ORE1 during salt-promoted senescence. *Plant J*. 2010;62(2):250-64.
- 17 8. Wagstaff C, Yang TJ, Stead AD, Buchanan-Wollaston V, Roberts JA. A molecular and structural characterization of senescing *Arabidopsis* siliques and  
18 comparison of transcriptional profiles with senescing petals and leaves. *Plant J*. 2009;57(4):690-705.
- 19 9. Vogelmann K, Drechsel G, Bergler J, Subert C, Philippar K, Soll J, et al. Early senescence and cell death in *Arabidopsis* saul1 mutants involves the  
20 PAD4-dependent salicylic acid pathway. *Plant Physiol*. 2012;159(4):1477-87.
- 21 10. Bowling SA, Clarke JD, Liu Y, Klessig DF, Dong X. The cpr5 mutant of *Arabidopsis* expresses both NPR1-dependent and NPR1-independent resistance.  
22 *Plant Cell*. 1997;9(9):1573-84.
- 23 11. Wang W, Barnaby JY, Tada Y, Li H, Tor M, Caldelari D, et al. Timing of plant immune responses by a central circadian regulator. *Nature*.  
24 2011;470(7332):110-4.
- 25 12. Attard A, Gourgues M, Callemeyn-Torre N, Keller H. The immediate activation of defense responses in *Arabidopsis* roots is not sufficient to prevent  
26 *Phytophthora parasitica* infection. *New Phytol*. 2010;187(2):449-60.
- 27 13. Ferrari S, Galletti R, Denoux C, De Lorenzo G, Ausubel FM, Dewdney J. Resistance to *Botrytis cinerea* induced in *Arabidopsis* by elicitors is  
28 independent of salicylic acid, ethylene, or jasmonate signaling but requires PHYTOALEXIN DEFICIENT3. *Plant Physiol*. 2007;144(1):367-79.
- 29 14. Povero G, Loreti E, Pucciariello C, Santaniello A, Di Tommaso D, Di Tommaso G, et al. Transcript profiling of chitosan-treated *Arabidopsis* seedlings. *J*  
30 *Plant Res*. 2011;124(5):619-29.

- 31 15. Raffaele S, Vaillau F, Leger A, Joubes J, Miersch O, Huard C, et al. A MYB transcription factor regulates very-long-chain fatty acid biosynthesis for  
32 activation of the hypersensitive cell death response in Arabidopsis. *Plant Cell*. 2008;20(3):752-67.
- 33 16. Lewsey MG, Murphy AM, Maclean D, Dalchau N, Westwood JH, Macaulay K, et al. Disruption of two defensive signaling pathways by a viral RNA  
34 silencing suppressor. *Mol Plant Microbe Interact*. 2010;23(7):835-45.
- 35 17. Kilian J, Whitehead D, Horak J, Wanke D, Weinl S, Batistic O, et al. The AtGenExpress global stress expression data set: protocols, evaluation and  
36 model data analysis of UV-B light, drought and cold stress responses. *Plant J*. 2007;50(2):347-63.
- 37 18. Laloi C, Stachowiak M, Pers-Kamczyc E, Warzych E, Murgia I, Apel K. Cross-talk between singlet oxygen- and hydrogen peroxide-dependent signaling  
38 of stress responses in Arabidopsis thaliana. *Proc Natl Acad Sci U S A*. 2007;104(2):672-7.
- 39 19. Cheng H, Zhang Q, Guo D. Genes that respond to H<sub>2</sub>O<sub>2</sub> are also evoked under light in Arabidopsis. *Mol Plant*. 2013;6(1):226-8.
- 40 20. Cools T, Iantcheva A, Weimer AK, Boens S, Takahashi N, Maes S, et al. The Arabidopsis thaliana checkpoint kinase WEE1 protects against premature  
41 vascular differentiation during replication stress. *Plant Cell*. 2011;23(4):1435-48.
- 42 21. Pecinka A, Dinh HQ, Baubec T, Rosa M, Lettner N, Mittelsten Scheid O. Epigenetic regulation of repetitive elements is attenuated by prolonged heat  
43 stress in Arabidopsis. *Plant Cell*. 2010;22(9):3118-29.
- 44 22. Jung C, Seo JS, Han SW, Koo YJ, Kim CH, Song SI, et al. Overexpression of AtMYB44 enhances stomatal closure to confer abiotic stress tolerance in  
45 transgenic Arabidopsis. *Plant Physiol*. 2008;146(2):623-35.
- 46 23. Dinneny JR, Long TA, Wang JY, Jung JW, Mace D, Pointer S, et al. Cell identity mediates the response of Arabidopsis roots to abiotic stress. *Science*.  
47 2008;320(5878):942-5.
- 48 24. Lee BH, Henderson DA, Zhu JK. The Arabidopsis cold-responsive transcriptome and its regulation by ICE1. *Plant Cell*. 2005;17(11):3155-75.
- 49 25. Kinoshita N, Wang H, Kasahara H, Liu J, Macpherson C, Machida Y, et al. IAA-Ala Resistant3, an evolutionarily conserved target of miR167, mediates  
50 Arabidopsis root architecture changes during high osmotic stress. *Plant Cell*. 2012;24(9):3590-602.
- 51 26. Qiao H, Chang KN, Yazaki J, Ecker JR. Interplay between ethylene, ETP1/ETP2 F-box proteins, and degradation of EIN2 triggers ethylene responses in  
52 Arabidopsis. *Genes Dev*. 2009;23(4):512-21.

53

54

55

**Supplemental Table S4.** Overview of the number of up- and down-regulated genes per condition in the experiments used in the meta-analysis. For each condition the associated experiment number is indicated.

## 1) Developmental induced cell death

|                                        |                                         | Number of genes |      |       | Condition | Experiment |
|----------------------------------------|-----------------------------------------|-----------------|------|-------|-----------|------------|
|                                        |                                         | Down            | Up   | Total |           |            |
| <i>1.1 Differentiation induced PCD</i> |                                         |                 |      |       |           |            |
| e-1 vs e-2                             | Xylem vs cortex                         | 3124            | 2208 | 5332  | 1         | 1          |
| e-3 vs e-5                             | VND6 vs Wt                              | 995             | 1273 | 2268  | 2         | 2          |
| e-4 vs e-5                             | SND1 vs Wt                              | 371             | 1030 | 1401  | 3         | 2          |
| e-6 vs e-7                             | VND7 vs mock                            | 64              | 133  | 197   | 4         | 3          |
| e-8 vs e-9                             | LRC vs ground                           | 994             | 1108 | 2102  | 5         | 4          |
| e-10 vs e-11                           | End vs embryo, bending cotyledon stage  | 2793            | 1834 | 4627  | 6         | 5          |
| e-13 vs e-15                           | Linear cotyledon                        | 2983            | 2907 | 5890  | 7         | 6          |
|                                        | vs globular stage, endosperm            |                 |      |       |           |            |
| e-14 vs e-12                           | Bending cotyledon                       | 2850            | 2120 | 4970  | 8         | 6          |
|                                        | vs heart stage, endosperm               |                 |      |       |           |            |
| e-16 vs e-18                           | Bending cotyledon                       | 2265            | 1770 | 4035  | 9         | 7          |
|                                        | vs heart stage, seed coat               |                 |      |       |           |            |
| e-17 vs e-18                           | Linear cotyledon                        | 1611            | 1643 | 3254  | 10        | 7          |
|                                        | vs heart stage, seed coat               |                 |      |       |           |            |
| <i>1.2 Senescence induced PCD</i>      |                                         |                 |      |       |           |            |
| e-19 vs e-21                           | Inducible ANAC059 vs empty vector       | 27              | 46   | 73    | 11        | 8          |
| e-20 vs e-21                           | Inducible ANAC092 vs empty vector       | 60              | 180  | 240   | 12        | 8          |
| e-22 vs e-23                           | Mature green vs senescing siliques      | 1513            | 1383 | 2896  | 13        | 9          |
| e-24 vs e-25                           | Rosette, green vs senescing leaves      | 2338            | 2572 | 4910  | 14        | 10         |
| e-26 vs e-27                           | Flower stage 15 vs stage 12, petals     | 2478            | 2217 | 4695  | 15        | 11         |
| e-28 vs e-29                           | Flower stage 15 vs stage 12, sepals     | 1794            | 1435 | 3229  | 16        | 12         |
| e-30 vs e-31                           | Leaf stage 6 vs 3.9,                    | 1485            | 1748 | 3233  | 17        | 13         |
|                                        | partially senescent vs mature green     |                 |      |       |           |            |
| e-32 vs e-34                           | <i>saul</i> vs wt, time 0, low light    | 1               | 26   | 27    | 18        | 14         |
| e-33 vs e-35                           | <i>saul</i> vs wt, time 48 h, low light | 2677            | 2172 | 4849  | 19        | 14         |

## 2) Environmental induced cell death

|                               |                                                           | Down | Up   | Total | Contrast | Experiment |
|-------------------------------|-----------------------------------------------------------|------|------|-------|----------|------------|
| <i>2.1 Biotic induced PCD</i> |                                                           |      |      |       |          |            |
| e-36 vs e-37                  | Fumonisin B1 vs mock, protoplast                          | 21   | 39   | 60    | 20       | 15         |
| e-38 vs e-39                  | <i>cpr5</i> vs wt                                         | 129  | 751  | 880   | 21       | 16         |
| e-40 vs e-42                  | <i>rpp4</i> vs wt, time 0                                 | 354  | 256  | 610   | 22       | 17         |
| e-41 vs e-43                  | <i>rpp4</i> vs wt, 6 days after inoculation               | 174  | 84   | 258   | 23       | 17         |
| e-44 vs e-45                  | <i>Phytophthora</i> inoculated root vs control, 30 hpi    | 1634 | 1303 | 2937  | 24       | 18         |
| e-46 vs e-48                  | <i>Botrytis</i> inoculated leaves, vs control, 18 hpi     | 73   | 539  | 612   | 25       | 19         |
| e-47 vs e-49                  | <i>Botrytis</i> inoculated leaves, vs control, 48 hpi     | 1597 | 1287 | 2884  | 26       | 19         |
| e-50 vs e-53                  | <i>Phytophthora</i> inoculated leaves, vs control, 6 hpi  | 1190 | 1051 | 2241  | 27       | 20         |
| e-51 vs e-54                  | <i>Phytophthora</i> inoculated leaves, vs control, 12 hpi | 333  | 658  | 991   | 28       | 20         |
| e-52 vs e-55                  | <i>Phytophthora</i> inoculated leaves, vs control, 24 hpi | 356  | 563  | 919   | 29       | 20         |
| e-56 vs e-57                  | NPP1 treated leaves vs mock, 4h                           | 241  | 722  | 963   | 30       | 21         |
| e-58 vs e-59                  | chitosan vs mock, seedlings, 3h                           | 501  | 634  | 1135  | 31       | 22         |
| e-60 vs e-61                  | HrpZ treated leaves vs mock, 4h                           | 1141 | 1374 | 2515  | 32       | 23         |
| e-62 vs e-63                  | AtMYB30-ox vs AtMYB30-as, <i>Xanthomonas</i>              | 35   | 53   | 88    | 33       | 24         |
|                               | inoculated, 90-105 min after inoc                         |      |      |       |          |            |

|                             |                                                                                                |             |           |              |                 |                   |
|-----------------------------|------------------------------------------------------------------------------------------------|-------------|-----------|--------------|-----------------|-------------------|
| e-64 vs e-65                | <i>Pseudomonas</i> expressing HopZ1a, into Wt plants vs <i>Pseudomonas</i> Wt , into Wt plants | 754         | 693       | 1447         | 34              | 25                |
| e-66 vs e-67                | Cucumber mosaic virus (CMV) 2b counter-defense protein- expressing plants vs wt plants         | 78          | 391       | 469          | 35              | 26                |
| <b>2.2 Oxidative stress</b> |                                                                                                | <b>Down</b> | <b>Up</b> | <b>Total</b> | <b>Contrast</b> | <b>Experiment</b> |
| e-68 vs e-69                | HL exposed cultures, vs control, 30 min                                                        | 42          | 277       | 319          | 36              | 27                |
| e-70 vs e-71                | <i>flu</i> vs wt, continuous light-dark-light, leaves                                          | 386         | 1261      | 1647         | 37              | 28                |
| e-72 vs e-73                | 20mM hydrogen peroxide vs control, 3 h, seedling                                               | 45          | 198       | 243          | 38              | 29                |
| e-74 vs e-75                | 500 ppb ozone vs control, 6h, seedling                                                         | 860         | 1538      | 2398         | 39              | 30                |
| e-76 vs e-77                | 5mM H <sub>2</sub> O <sub>2</sub> vs control, seedling dark grown                              | 205         | 693       | 898          | 40              | 31                |
| e-78 vs e-80                | Methyl viologen vs control, 12h, shoots                                                        | 0           | 73        | 73           | 41              | 32                |
| e-79 vs e-81                | Methyl viologen vs control, 24h, shoots                                                        | 8           | 274       | 282          | 42              | 32                |
| e-82 vs e-84                | Methyl viologen vs control, 12h, roots                                                         | 3           | 1         | 4            | 43              | 33                |
| e-83 vs e-85                | Methyl viologen vs control, 24h, roots                                                         | 99          | 21        | 120          | 44              | 33                |
| e-86 vs e-88                | <i>cat2</i> mutant, high light, vs control, 3h                                                 | 563         | 593       | 1156         | 45              | 34                |
| e-87 vs e-88                | <i>cat2</i> mutant, high light, vs control, 8h                                                 | 1326        | 1674      | 3000         | 46              | 34                |
| <b>2.3 Genotoxic stress</b> |                                                                                                |             |           |              |                 |                   |
| e-89 vs e-91                | <i>wee1</i> KO- Hydroxyurea, vs control,5h                                                     | 3           | 60        | 63           | 47              | 35                |
| e-90 vs e-92                | <i>wee1</i> KO- Hydroxyurea, vs control,24h                                                    | 49          | 138       | 187          | 48              | 35                |
| e-93 vs e-95                | bleomycin +mitomycin vs control, shoots, 12 h                                                  | 25          | 158       | 183          | 49              | 36                |
| e-94 vs e-96                | bleomycin +mitomycin vs control, shoots, 24 h                                                  | 16          | 152       | 168          | 50              | 36                |
| e-97 vs e-99                | bleomycin +mitomycin vs control, roots, 12 h                                                   | 116         | 223       | 339          | 51              | 37                |
| e-98 vs e-100               | bleomycin +mitomycin vs control, roots, 24 h                                                   | 175         | 283       | 458          | 52              | 37                |
| e-101 vs e-102              | TA, cell cultures vs mock, 6h                                                                  | 1           | 189       | 190          | 53              | 38                |
| e-103 vs e-104              | IXB, cell cultures vs mock, 6h                                                                 | 0           | 37        | 37           | 54              | 39                |
| <b>2.4 UV stress</b>        |                                                                                                |             |           |              |                 |                   |
| e-105 vs e-106              | UV-1-day radiation vs white light, shoots 18d, 24h                                             | 483         | 570       | 1053         | 55              | 40                |
| e-107 vs e-95               | UV-15min vs control, shoots 16d , 12 h                                                         | 89          | 358       | 447          | 56              | 41                |
| e-108 vs e-96               | UV-15min vs control, shoots 16d , 24 h                                                         | 87          | 314       | 401          | 57              | 41                |
| e-109 vs e-99               | UV-15min vs control, roots 16d , 12 h                                                          | 3           | 4         | 7            | 58              | 42                |
| e-110 vs e-100              | UV-15min vs control, roots 16d , 24 h                                                          | 88          | 155       | 243          | 59              | 42                |
| <b>2.5 Heat stress</b>      |                                                                                                |             |           |              |                 |                   |
| e-111 vs e-112              | 30 h, 37 °C- no recovery vs control, 3week seedling                                            | 2125        | 2170      | 4295         | 60              | 43                |
| e-113 vs e-115              | 10m , 55 °C vs mock,suspension cells                                                           | 610         | 759       | 1369         | 61              | 44                |
| <b>2.6 Salt stress</b>      |                                                                                                |             |           |              |                 |                   |
| e-116 vs e-117              | 250mM NaCl vs control, rosette leaves, 24 h                                                    | 1251        | 965       | 1351         | 62              | 45                |
| e-118 vs e-120              | 140mM NaCl vs control, seedling root, 16 h                                                     | 162         | 334       | 496          | 63              | 46                |
| e-119 vs e-120              | 140mM NaCl vs control, seedling root, 32 h                                                     | 112         | 300       | 412          | 64              | 46                |
| e-121 vs e-95               | 250mM NaCl vs control, shoots 16d , 12 h                                                       | 342         | 449       | 791          | 65              | 47                |
| e-122 vs e-96               | 250mM NaCl vs control, shoots 16d , 24 h                                                       | 874         | 953       | 1827         | 66              | 47                |
| e-123 vs e-99               | 250mM NaCl vs control, roots 16d , 12 h                                                        | 1652        | 1613      | 3265         | 67              | 48                |

|                |                                         |      |      |      |    |    |
|----------------|-----------------------------------------|------|------|------|----|----|
| e-124 vs e-100 | 250mM NaCl vs control, roots 16d , 24 h | 1269 | 1618 | 2887 | 68 | 48 |
|----------------|-----------------------------------------|------|------|------|----|----|

### 2.7 Cold stress

|                |                                   |     |      |      |    |    |
|----------------|-----------------------------------|-----|------|------|----|----|
| e-125 vs e-126 | Wildtype_24h 0°C vs control, 24 h | 938 | 1123 | 2061 | 69 | 49 |
|----------------|-----------------------------------|-----|------|------|----|----|

|                |                                               |     |     |      |    |    |
|----------------|-----------------------------------------------|-----|-----|------|----|----|
| e-127 vs e-129 | 4°C vs 24°C, 7days treated, seedlings 10d old | 784 | 718 | 1502 | 70 | 50 |
|----------------|-----------------------------------------------|-----|-----|------|----|----|

|                |                                               |     |     |     |    |    |
|----------------|-----------------------------------------------|-----|-----|-----|----|----|
| e-128 vs e-130 | 4°C vs 24°C, 7days treated, seedlings 18d old | 368 | 358 | 726 | 71 | 50 |
|----------------|-----------------------------------------------|-----|-----|-----|----|----|

### 2.8 Osmotic stress

|               |                                               |      |      |      |    |    |
|---------------|-----------------------------------------------|------|------|------|----|----|
| e-131 vs e-95 | 300 mM Mannitol-12 h vs control, shoots, 16 d | 1901 | 1657 | 3558 | 72 | 51 |
|---------------|-----------------------------------------------|------|------|------|----|----|

|               |                                               |      |      |      |    |    |
|---------------|-----------------------------------------------|------|------|------|----|----|
| e-132 vs e-96 | 300 mM Mannitol-24 h vs control, shoots, 16 d | 2439 | 2168 | 4607 | 73 | 51 |
|---------------|-----------------------------------------------|------|------|------|----|----|

|               |                                              |      |      |      |    |    |
|---------------|----------------------------------------------|------|------|------|----|----|
| e-133 vs e-99 | 300 mM Mannitol-12 h vs control, roots, 16 d | 1501 | 1196 | 2697 | 74 | 52 |
|---------------|----------------------------------------------|------|------|------|----|----|

|                |                                              |      |      |      |    |    |
|----------------|----------------------------------------------|------|------|------|----|----|
| e-134 vs e-100 | 300 mM Mannitol-24 h vs control, roots, 16 d | 1290 | 1073 | 2363 | 75 | 52 |
|----------------|----------------------------------------------|------|------|------|----|----|

|                |                                                  |     |     |     |    |    |
|----------------|--------------------------------------------------|-----|-----|-----|----|----|
| e-135 vs e-136 | 300 mM Mannitol-10 d vs control, 30 d old , leaf | 331 | 533 | 864 | 76 | 53 |
|----------------|--------------------------------------------------|-----|-----|-----|----|----|

|                |                                                  |     |     |      |    |    |
|----------------|--------------------------------------------------|-----|-----|------|----|----|
| e-137 vs e-138 | 301 mM Mannitol-10 d vs control, 30 d old , leaf | 642 | 857 | 1499 | 77 | 54 |
|----------------|--------------------------------------------------|-----|-----|------|----|----|

### 2.9 Hormone

|  |  | Down | Up | Total | Contrast | Experiment |
|--|--|------|----|-------|----------|------------|
|--|--|------|----|-------|----------|------------|

|                |                            |    |    |    |    |    |
|----------------|----------------------------|----|----|----|----|----|
| e-139 vs e-140 | ACC (10 uM, 3 h), seedling | 14 | 53 | 67 | 78 | 55 |
|----------------|----------------------------|----|----|----|----|----|

|                |                             |     |     |     |    |    |
|----------------|-----------------------------|-----|-----|-----|----|----|
| e-141 vs e-142 | 5 ppm ethylene, 3h, petiole | 149 | 244 | 393 | 79 | 56 |
|----------------|-----------------------------|-----|-----|-----|----|----|

|                |                                           |    |     |     |    |    |
|----------------|-------------------------------------------|----|-----|-----|----|----|
| e-143 vs e-144 | Salicylic acid (SA, 10 uM, 3 h), seedling | 96 | 403 | 499 | 80 | 57 |
|----------------|-------------------------------------------|----|-----|-----|----|----|

|                |                                        |      |      |      |    |    |
|----------------|----------------------------------------|------|------|------|----|----|
| e-145 vs e-146 | 10 ppm ethylene vs air, 3 week old, 4h | 2969 | 3027 | 5996 | 81 | 58 |
|----------------|----------------------------------------|------|------|------|----|----|

|                |                                   |      |      |      |    |    |
|----------------|-----------------------------------|------|------|------|----|----|
| e-147 vs e-148 | 2 mM SA vs control, seedling, 24h | 1543 | 1558 | 3101 | 82 | 59 |
|----------------|-----------------------------------|------|------|------|----|----|

1



1 **Supplemental Tables S6.1 – S6.6**

2 **Supplemental Tables S6.1.** Performance results of SVM and RF classification of dPCD versus ePCD instances based on the expression  
 3 profiles of various gene (feature) sets in various experiment subsets. The SVM and RF parameter settings for all analyses can be found in  
 4 Supplemental Tables S6.2 and S6.3, respectively (linked to the identifiers in the first column). The performance scores displayed are MCC  
 5 scores generated by 10-fold cross-validation (or 5-fold cross-validation when the number of contrasts in one of the classes was < 10). No  
 6 optimal settings are reported for the sampled entries (C1.SVM-D4.SVM and C1.RF-D4.RF) since the results are averaged over a hundred runs.

7

| Identifier | dPCD Class           | ePCD Class               | #dPCD contrasts | #ePCD contrasts | Balanced | Gene Selection | Algorithm | MCC (Matthews Correlation Coefficient) |
|------------|----------------------|--------------------------|-----------------|-----------------|----------|----------------|-----------|----------------------------------------|
| A1.SVM     | All dPCD             | All ePCD                 | 19              | 64              | No       | All            | SVM       | 0.75                                   |
| A1.RF      |                      |                          |                 |                 |          |                | RF        | 0.71                                   |
| A2.SVM     | All dPCD             | All ePCD                 | 19              | 64              | No       | Curated        | SVM       | 0,71                                   |
| A2.RF      |                      |                          |                 |                 |          |                | RF        | 0,76                                   |
| A3.SVM     | All dPCD             | Osmotic+genotoxic+biotic | 19              | 30              | No       | All            | SVM       | 0.75                                   |
| A3.RF      |                      |                          |                 |                 |          |                | RF        | 0.79                                   |
| A4.SVM     | All dPCD             | Osmotic+genotoxic+biotic | 19              | 30              | No       | Curated        | SVM       | 0,79                                   |
| A4.RF      |                      |                          |                 |                 |          |                | RF        | 0,83                                   |
| B1.SVM     | Differentiation dPCD | All ePCD                 | 10              | 64              | No       | All            | SVM       | 0.88                                   |
| B1.RF      |                      |                          |                 |                 |          |                | RF        | 0.82                                   |
| B2.SVM     | Differentiation dPCD | All ePCD                 | 10              | 64              | No       | Curated        | SVM       | 0,88                                   |
| B2.RF      |                      |                          |                 |                 |          |                | RF        | 0,77                                   |
| B3.SVM     | Differentiation dPCD | Osmotic+genotoxic+biotic | 10              | 30              | No       | All            | SVM       | 0.93                                   |
| B3.RF      |                      |                          |                 |                 |          |                | RF        | 0.87                                   |
| B4.SVM     | Differentiation dPCD | Osmotic+genotoxic+biotic | 10              | 30              | No       | Curated        | SVM       | 0,93                                   |
| B4.RF      |                      |                          |                 |                 |          |                | RF        | 0,87                                   |

8  
9

10 **Supplemental Table S6.1 (continued):**

11

|        |                      |                                          |    |    |     |         |     |      |
|--------|----------------------|------------------------------------------|----|----|-----|---------|-----|------|
| C1.SVM | All dPCD             | Sampled from all ePCD                    | 19 | 19 | Yes | All     | SVM | 0.74 |
| C1.RF  |                      |                                          |    |    |     |         | RF  | 0.77 |
| C2.SVM | All dPCD             | Sampled from all ePCD                    | 19 | 19 | Yes | Curated | SVM | 0,77 |
| C2.RF  |                      |                                          |    |    |     |         | RF  | 0,81 |
| C3.SVM | All dPCD             | Sampled from<br>Osmotic+genotoxic+biotic | 19 | 19 | Yes | All     | SVM | 0.73 |
| C3.RF  |                      |                                          |    |    |     |         | RF  | 0.79 |
| C4.SVM | All dPCD             | Sampled from<br>Osmotic+genotoxic+biotic | 19 | 19 | Yes | Curated | SVM | 0,76 |
| C4.RF  |                      |                                          |    |    |     |         | RF  | 0,83 |
| D1.SVM | Differentiation dPCD | Sampled from all ePCD                    | 10 | 10 | Yes | All     | SVM | 0.75 |
| D1.RF  |                      |                                          |    |    |     |         | RF  | 0.8  |
| D2.SVM | Differentiation dPCD | Sampled from all ePCD                    | 10 | 10 | Yes | Curated | SVM | 0,79 |
| D2.RF  |                      |                                          |    |    |     |         | RF  | 0,81 |
| D3.SVM | Differentiation dPCD | Sampled from<br>Osmotic+genotoxic+biotic | 10 | 10 | Yes | All     | SVM | 0.71 |
| D3.RF  |                      |                                          |    |    |     |         | RF  | 0.79 |
| D4.SVM | Differentiation dPCD | Sampled from<br>Osmotic+genotoxic+biotic | 10 | 10 | Yes | Curated | SVM | 0.77 |
| D4.RF  |                      |                                          |    |    |     |         | RF  | 0.82 |

12

13 **Supplemental Table S6.2.** Optimized SVM parameter settings for the analyses in Supplemental Table S6.1

| Identifier | Kernel Type | Gamma | Nu  | Eps   |
|------------|-------------|-------|-----|-------|
| A1.SVM     | RBF         | 0     | 0.2 | 0.001 |
| A2.SVM     | RBF         | 0,125 | 0,2 | 0,001 |
| A3.SVM     | Linear      | 0     | 0.1 | 0.001 |
| A4.SVM     | RBF         | 0,5   | 0,2 | 0,001 |
| B1.SVM     | RBF         | 0     | 0.1 | 0.001 |
| B2.SVM     | RBF         | 0,125 | 0,1 | 0,001 |
| B3.SVM     | RBF         | 0.5   | 0.2 | 0.001 |
| B4.SVM     | RBF         | 0,5   | 0,2 | 0,001 |

14

15

16

17 **Supplemental Table S6.3.** Optimized RF parameter settings for the analyses in Supplemental Table S6.1

| Identifier | max-depth | min instances | num trees |
|------------|-----------|---------------|-----------|
| A1.RF      | 2         | 7             | 20        |
| A2.RF      | 2         | 5             | 30        |
| A3.RF      | 2         | 4             | 10        |
| A4.RF      | 2         | 3             | 100       |
| B1.RF      | 1         | 10            | 30        |
| B2.RF      | 1         | 10            | 30        |
| B3.RF      | 1         | 10            | 30        |
| B4.RF      | 1         | 10            | 30        |

18

19

20 **Supplemental Table S6.4.** The performance of binary classifiers discriminating a particular PCD subclass from all other subclasses. N/A  
 21 indicates that the MCC could not be calculated by lack of positives or negatives, and thus indicates very poor performance. The SVM and RF  
 22 parameter settings for all analyses can be found in Supplemental Tables S6.5 and S6.6, respectively (linked to the identifiers in the first column).  
 23

| Identifier | Class 1              | Class 2                    | #Contrasts<br>Class 1 | #Contrasts<br>Class 2 | Gene Selection | Algorithm | MCC  |
|------------|----------------------|----------------------------|-----------------------|-----------------------|----------------|-----------|------|
| E1.SVM     | Senescence dPCD      | All - Senescence dPCD      | 9                     | 74                    | All            | SVM       | 0.46 |
| E1.RF      |                      |                            |                       |                       |                | RF        | 0.46 |
| E2.SVM     | Senescence dPCD      | All - Senescence dPCD      | 9                     | 74                    | Curated        | SVM       | 0.73 |
| E2.RF      |                      |                            |                       |                       |                | RF        | 0.4  |
| F1.SVM     | Differentiation dPCD | All - Differentiation dPCD | 10                    | 73                    | All            | SVM       | 0.88 |
| F1.RF      |                      |                            |                       |                       |                | RF        | 0.75 |
| F2.SVM     | Differentiation dPCD | All - Differentiation dPCD | 10                    | 73                    | Curated        | SVM       | 0.88 |
| F2.RF      |                      |                            |                       |                       |                | RF        | 0.82 |
| G1.SVM     | Genotoxic ePCD       | All - Genotoxic ePCD       | 9                     | 74                    | All            | SVM       | 0.73 |
| G1.RF      |                      |                            |                       |                       |                | RF        | 0.8  |
| G2.SVM     | Genotoxic ePCD       | All - Genotoxic ePCD       | 9                     | 74                    | Curated        | SVM       | 0.8  |
| G2.RF      |                      |                            |                       |                       |                | RF        | 0.8  |
| H1.SVM     | Oxidative ePCD       | All - Oxidative ePCD       | 10                    | 73                    | All            | SVM       | 0.3  |
| H1.RF      |                      |                            |                       |                       |                | RF        | N/A  |
| H2.SVM     | Oxidative ePCD       | All - Oxidative ePCD       | 10                    | 73                    | Curated        | SVM       | 0.29 |
| H2.RF      |                      |                            |                       |                       |                | RF        | N/A  |
| I1.SVM     | UV ePCD              | All - UV ePCD              | 5                     | 78                    | All            | SVM       | N/A  |
| I1.RF      |                      |                            |                       |                       |                | RF        | N/A  |
| I2.SVM     | UV ePCD              | All - UV ePCD              | 5                     | 78                    | Curated        | SVM       | N/A  |
| I2.RF      |                      |                            |                       |                       |                | RF        | N/A  |

24  
25  
26  
27  
28

**Supplemental Table S6.4 (continued)**

|        |                   |                         |    |    |         |     |      |
|--------|-------------------|-------------------------|----|----|---------|-----|------|
| J1.SVM | Temperature ePCD  | All - Temperature ePCD  | 6  | 77 | All     | SVM | N/A  |
| J1.RF  |                   |                         |    |    |         | RF  | N/A  |
| J2.SVM | Temperature ePCD  | All - Temperature ePCD  | 6  | 77 | Curated | SVM | 0.39 |
| J2.RF  |                   |                         |    |    |         | RF  | 0.39 |
| K1.SVM | Osmotic/Salt ePCD | All - Osmotic/Salt ePCD | 13 | 70 | All     | SVM | 0.77 |
| K1.RF  |                   |                         |    |    |         | RF  | 0.82 |
| K2.SVM | Osmotic/Salt ePCD | All - Osmotic/Salt ePCD | 13 | 70 | Curated | SVM | 0.96 |
| K2.RF  |                   |                         |    |    |         | RF  | 0.86 |
| L1.SVM | Hormone ePCD      | All - Hormone ePCD      | 5  | 78 | All     | SVM | N/A  |
| L1.RF  |                   |                         |    |    |         | RF  | 0.44 |
| L2.SVM | Hormone ePCD      | All - Hormone ePCD      | 5  | 78 | Curated | SVM | 0.62 |
| L2.RF  |                   |                         |    |    |         | RF  | 0.17 |
| M1.SVM | Biotic ePCD       | All - Biotic ePCD       | 16 | 67 | All     | SVM | 0.62 |
| M1.RF  |                   |                         |    |    |         | RF  | 0.49 |
| M2.SVM | Biotic ePCD       | All - Biotic ePCD       | 16 | 67 | Curated | SVM | 0.66 |
| M2.RF  |                   |                         |    |    |         | RF  | 0.46 |

29  
30  
31  
32  
33

34

35

36 **Supplemental Table S6.5.** Optimized SVM parameter settings for the analyses in Supplemental Table S6.4

| Identifier | Kernel Type | Gamma | Nu  | Eps   |
|------------|-------------|-------|-----|-------|
| E1.SVM     | RBF         | 0     | 0.1 | 0.001 |
| E2.SVM     | RBF         | 0.03  | 0.1 | 0.001 |
| F1.SVM     | RBF         | 0     | 0.1 | 0.001 |
| F2.SVM     | RBF         | 0.03  | 0.1 | 0.001 |
| G1.SVM     | RBF         | 0.03  | 0.1 | 0.001 |
| G2.SVM     | RBF         | 0     | 0.1 | 0.001 |
| H1.SVM     | RBF         | 0.5   | 0.1 | 0.001 |
| H2.SVM     | RBF         | 0.5   | 0.1 | 0.001 |
| I1.SVM     | N/A         | N/A   | N/A | N/A   |
| I2.SVM     | N/A         | N/A   | N/A | N/A   |
| J1.SVM     | N/A         | N/A   | N/A | N/A   |
| J2.SVM     | RBF         | 2     | 0.1 | 0.001 |
| K1.SVM     | RBF         | 0     | 0.1 | 0.001 |
| K2.SVM     | RBF         | 0.5   | 0.2 | 0.001 |
| L1.SVM     | N/A         | N/A   | N/A | N/A   |
| L2.SVM     | RBF         | 2     | 0.1 | 0.01  |
| M1.SVM     | RBF         | 0     | 0.1 | 0.001 |
| M2.SVM     | RBF         | 0.5   | 0.1 | 0.001 |

37

38

39

40

41

42 **Supplemental Table S6.6.** Optimized RF parameter settings for the analyses in Supplemental Table S6.4

| Identifier | max-depth | min instances | num trees |
|------------|-----------|---------------|-----------|
| E1.RF      | 1         | 8             | 20        |
| E2.RF      | 3         | 1             | 30        |
| F1.RF      | 1         | 1             | 10        |
| F2.RF      | 2         | 1             | 30        |
| G1.RF      | 1         | 8             | 10        |
| G2.RF      | 1         | 8             | 10        |
| H1.RF      | N/A       | N/A           | N/A       |
| H2.RF      | N/A       | N/A           | N/A       |
| I1.RF      | N/A       | N/A           | N/A       |
| I2.RF      | N/A       | N/A           | N/A       |
| J1.RF      | N/A       | N/A           | N/A       |
| J2.RF      | 1         | 2             | 200       |
| K1.RF      | 1         | 1             | 10        |
| K2.RF      | 1         | 1             | 10        |
| L1.RF      | 1         | 5             | 20        |
| L2.RF      | 4         | 2             | 30        |
| M1.RF      | 2         | 6             | 10        |
| M2.RF      | 1         | 9             | 10        |

43

44

45

46

47





1 **Supplemental Table S7.** Phytozome blast search for putative homologs of the Arabidopsis dPCD marker genes MC9, BFN1, PASPA3, RNS3,  
 2 and SCPL48

|                                          | MC9 (325AA)        |      |              |          | BFN1 (305AA)       |       |              |          | PASPA3 (508AA)     |       |              |          |
|------------------------------------------|--------------------|------|--------------|----------|--------------------|-------|--------------|----------|--------------------|-------|--------------|----------|
|                                          | best blast hit     | %ID  | blast length | e-value  | best blast hit     | %ID   | blast length | e-value  | best blast hit     | %ID   | blast length | e-value  |
| <b><i>Arabidopsis lyrata</i></b>         | scaffold_600361.1  | 95.3 | 319          | 1.2e-163 | fgenesh2_kg.1      | 98.69 | 305          | 4.6e-169 | fgenesh2_kg.6      | 95.67 | 508          | 1.1e-268 |
| <b><i>Medicago truncatula</i></b>        | AES66180           | 42.4 | 300          | 3.5e-42  | AES63715           | 68.67 | 300          | 2.2e-113 | AES92659           | 63.08 | 520          | 5.8e-184 |
| <b><i>Solanum lycopersicum</i></b>       | Solyc10g081300.1.1 | 53.5 | 331          | 8.9e-83  | Solyc02g078910.2.1 | 69.00 | 300          | 1.1e-121 | Solyc02g080880.2.1 | 66.60 | 515          | 4.0e-190 |
| <b><i>Populus trichocarpa</i></b>        | POPTR_0006s02730.1 | 65.3 | 326          | 7.8e-109 | POPTR_0011s04430.1 | 71.90 | 274          | 6.2e-116 | POPTR_0004s00900.1 | 64.79 | 514          | 1.0e-186 |
| <b><i>Oryza sativa</i></b>               | OS11T0134700-01    | 56.5 | 329          | 6.2e-87  | OS04T0636400-01    | 67.23 | 296          | 7.5e-114 | OS01T0663400-01    | 60.99 | 523          | 1.4e-178 |
| <b><i>Brachypodium distachyon</i></b>    | BRADI2G50480.1     | 50.7 | 337          | 8.7e-77  | BRADI5G23280.1     | 69.64 | 280          | 1.4e-115 | BRADI2G16160.1     | 62.23 | 511          | 7.3e-183 |
| <b><i>Hordeum vulgare</i></b>            | MLOC_5735.2        | 52.9 | 331          | 7.9e-81  | MLOC_73587.1       | 56.57 | 293          | 1.1e-113 | MLOC_64394.1       | 54.33 | 508          | 7.2e-158 |
| <b><i>Zea mays</i></b>                   | GRMZM2G022799_P01  | 51.2 | 336          | 1.1e-76  | GRMZM2G168744_P01  | 68.93 | 280          | 4.3e-114 | GRMZM2G065757_P01  | 60.74 | 517          | 6.2e-177 |
| <b><i>Amborella trichopoda</i></b>       | ERM98168           | 54.1 | 320          | 1.6e-85  | ERN03432           | 56.57 | 274          | 1.4e-86  | ERN00700           | 64.24 | 509          | 1.5e-183 |
| <b><i>Selaginella moellendorffii</i></b> | EFJ20498           | 50.5 | 196          | 6.4e-68  | EFJ33450           | 46.32 | 285          | 1.4e-70  | EFJ06917           | 52.80 | 500          | 1.8e-146 |
| <b><i>Physcomitrella patens</i></b>      | PP1S165_65V6       | 55.0 | 169          | 7.1e-73  | PP1S211_122V6.1    | 49.20 | 311          | 2.2e-78  | PP1S93_73V6.2      | 55.29 | 510          | 3.6e-156 |
| <b><i>Chlamydomonas reinhardtii</i></b>  | EDP04316           | 39.5 | 253          | 3.1e-57  | EDP02767           | 37.84 | 37           | 7.7      | EDP04281           | 55.74 | 235          | 6.1e-74  |

3

4

5

6

7 **Supplemental Table S7** (continued)

8

|                                                    | RNS3 (222AA)       |       |              |          | SCPL48 (510AA)     |       |              |          |
|----------------------------------------------------|--------------------|-------|--------------|----------|--------------------|-------|--------------|----------|
|                                                    | best blast hit     | %ID   | blast length | e-value  | best blast hit     | %ID   | blast length | e-value  |
| <b><i>Arabidopsis</i></b><br><i>lyrata</i>         | fgenes2_kg.1       | 96.40 | 222          | 2.4e-124 | fgenes2_kg.5       | 97.06 | 510          | 1.6e-276 |
| <b><i>Medicago</i></b><br><i>truncatula</i>        | AES96753           | 65.91 | 220          | 1.7e-90  | AES67523           | 66.47 | 501          | 1.1e-184 |
| <b><i>Solanum</i></b><br><i>lycopersicum</i>       | Solyc05g007940.2.1 | 58.48 | 224          | 1.0e-74  | Solyc06g017860.1.1 | 68.18 | 506          | 1.1e-187 |
| <b><i>Populus</i></b><br><i>trichocarpa</i>        | POPTR_0008s08650.1 | 64.89 | 225          | 1.1e-84  | POPTR_0004s22520.1 | 66.67 | 504          | 1.9e-185 |
| <b><i>Oryza</i></b><br><i>sativa</i>               | OS08T0434100-01    | 56.68 | 217          | 5.3e-74  | OS02T0114200-01    | 66.02 | 465          | 6.4e-172 |
| <b><i>Brachypodium</i></b><br><i>distachyon</i>    | BRADI3G37130.2     | 58.05 | 205          | 2.4e-74  | BRADI3G01320.1     | 66.11 | 478          | 2.5e-175 |
| <b><i>Hordeum</i></b><br><i>vulgare</i>            | MLOC_19306.1       | 58.42 | 202          | 4.8e-74  | MLOC_77869.2       | 65.68 | 472          | 3.5e-174 |
| <b><i>Zea</i></b><br><i>mays</i>                   | GRMZM2G161274_P02  | 56.16 | 219          | 2.9e-76  | GRMZM2G020146_P01  | 63.47 | 501          | 1.5e-173 |
| <b><i>Amborella</i></b><br><i>trichopoda</i>       | ERM94495           | 60.55 | 218          | 5.2e-78  | ERN12871           | 65.73 | 496          | 1.5e-181 |
| <b><i>Selaginella</i></b><br><i>moellendorffii</i> | EFJ09665           | 50.22 | 225          | 7.2e-65  | EFJ15031           | 59.57 | 465          | 6.8e-156 |
| <b><i>Physcomitrella</i></b><br><i>patens</i>      | PP1S59_320V6.1     | 47.87 | 211          | 2.1e-57  | PP1S149_206V6.1    | 59.53 | 467          | 6.9e-153 |
| <b><i>Chlamydomonas</i></b><br><i>reinhardtii</i>  | EDP05112           | 38.24 | 204          | 7.8e-35  | EDP01561           | 44.67 | 441          | 2.9e-106 |

9
